# Supplementary material for: Targeting von Willebrand Factor in Ischaemic Stroke: Focus on Clinical Evidence
Source: PubMed Central journal article supplement (PMC6193403; doi:10.1055/s-0038-1648251), 2018-05-30
Supplement: 10-1055-s-0038-1648251-s170843.pdf [file 10-1055-s-0038-1648251-s170843.pdf]

**Supplementary Table S1** Studies on the association between vWF and ischaemic stroke

| Reference (including PMID number)         | Sample size                  | Population                                                      | Measurements + endpoint                                                                                                                                                                             | Follow-up | Results                                                                                                                                                                                                                                                                                                                                                                    |
|-------------------------------------------|------------------------------|-----------------------------------------------------------------|-----------------------------------------------------------------------------------------------------------------------------------------------------------------------------------------------------|-----------|----------------------------------------------------------------------------------------------------------------------------------------------------------------------------------------------------------------------------------------------------------------------------------------------------------------------------------------------------------------------------|
| <b>Case control studies</b>               |                              |                                                                 |                                                                                                                                                                                                     |           |                                                                                                                                                                                                                                                                                                                                                                            |
| Catto et al, Thromb Haemost, 1997 9241740 | 208 patients<br>184 controls | Patients with stroke and healthy controls                       | vWF:Ag levels and FVIII:C initially and after 3 mo<br><br>Mortality<br>Association between vWF/FVIII and stroke subtype                                                                             | 6 mo      | - vWF antigen and FVIII:C significantly higher in cases than in controls<br>- Initial vWF and FVIII:C levels significantly higher in subjects with LVD compared with the SVD group<br>- OR 1.73 (1.12, 2.66)* for death by increase of 1 U/mL in vWF levels<br><br>Adjustments: *stroke sub-type                                                                           |
| Qizilbash et al, Neurology, 1997 9409345  | 95 patients<br>236 controls  | Patients with TIA or minor IS and age- and sex-matched controls | vWF:Ag levels at admission<br><br>Association between vWF:Ag and ischaemic events                                                                                                                   | None      | - vWF antigen significantly higher in cases than in controls<br>- OR for ischaemic stroke in highest quartile of vWF: 2.36*<br><br>Adjustments: *age and sex                                                                                                                                                                                                               |
| Bongers et al, Stroke, 2006 16990571      | 124 patients<br>125 controls | First-ever IS patients and age- and sex-matched controls        | vWF:Ag, vWF:RCo, ADAMTS13 and FVIII 7–14 d after stroke + vWF:Ag and vWF:RCo in 64 patients 3 mo after stroke<br><br>vWF:Ag levels, vWF:RCo activity, FVIII:C and ADAMTS13 activity and stroke risk | None      | - vWF:Ag, vWF:RCo and FVIII:C initially significantly higher in cases<br>- OR in highest quartile of vWF:Ag: 3.2 (1.4–7.5)<br>- Other measurements not significant<br>- No difference in vWF:Ag and vWF:RCo 3 mo after stroke between cases and controls                                                                                                                   |
| Carter et al, Stroke, 2007 17446429       | 545 patients<br>330 controls | IS patients and age-matched controls                            | Association between vWF:Ag, FVIII:C and death >30 d after events                                                                                                                                    | 7 y       | - HR for highest quartile FVIII for death 2.06 (1.40–3.02)<br>- HR from univariate analysis for highest quartile vWF:Ag and post-stroke mortality: 3.92 (2.46–6.23)<br>- HR from multivariate analysis* for highest quartile vWF:Ag and post-stroke mortality: 2.15 (1.18–3.91)<br><br>*Cox regression analysis including age, stroke sub-type, previous stroke/TIA and AF |

(Continued)

Supplementary Table S1 (Continued)

| Reference (including PMID number)                | Sample size                  | Population                                                                                                                        | Measurements + endpoint                                                                                             | Follow-up | Results                                                                                                                                                                                                                                                                                                                                                                                                                                                                                                                                                                                                                                                                                                                                                   |
|--------------------------------------------------|------------------------------|-----------------------------------------------------------------------------------------------------------------------------------|---------------------------------------------------------------------------------------------------------------------|-----------|-----------------------------------------------------------------------------------------------------------------------------------------------------------------------------------------------------------------------------------------------------------------------------------------------------------------------------------------------------------------------------------------------------------------------------------------------------------------------------------------------------------------------------------------------------------------------------------------------------------------------------------------------------------------------------------------------------------------------------------------------------------|
| Hanson et al, J Thromb Haemost, 2011 21054779    | 600 patients<br>600 controls | Data from 'SAHLIS'; First-ever or recurrent IS patients and age, gender and geographic area-matched controls                      | Association between vWF:Ag levels and stroke sub-type at admission and after 3 mo                                   | 3 mo      | <ul style="list-style-type: none"> <li>- vWF:Ag significantly higher in cases (both initially and after 3 mo) than controls</li> <li>- vWF:Ag significantly higher in acute phase than after 3 mo in cases</li> <li>- Significantly higher vWF:Ag levels in LVD and CE sub-type than SVD in acute phase; Significantly higher vWF:Ag in CE sub-type than SVD after 3 mo</li> <li>- Unadjusted OR for acute phase vWF:Ag and overall IS: 2.00 (1.74–2.29)</li> <li>- Adjusted OR for vWF:Ag and overall stroke: 2.01 (1.73–2.34)*; 1.73 (1.40–2.14)†</li> </ul> Adjustments: *Smoking, diabetes, hypertension, and hyperlipidaemia for overall IS, as well as age, sex and geographic area for sub-types; †All as mentioned above and hsCRP and fibrinogen |
| van Schie et al, J Thromb Haemost, 2010 20345720 | 171 patients<br>107 controls | 'The ATTAC study', patients with first IS or TIA and controls, age 18–55 y                                                        | vWFpp and vWF:Ag levels at 3 mo                                                                                     | None      | <ul style="list-style-type: none"> <li>- vWF:Ag significantly higher in cases than in controls</li> <li>- vWF:pp not significantly different</li> <li>- RR for IS in highest vWF:pp and vWF:Ag quartile: 1.7 (95% CI, 1.1–2.8)* and 1.9 (95% CI, 1.1–3.1)*</li> </ul> Adjustments: *Age, sex, smoking, hypertension, diabetes mellitus, hyperlipidaemia                                                                                                                                                                                                                                                                                                                                                                                                   |
| van Schie et al, J Thromb Haemost, 2010 20345720 | 101 patients<br>103 controls | 'The COCOS study', patients with first IS or TIA patients and controls, age 18–75 y                                               | vWFpp and vWF:Ag levels 7–14 d after the event                                                                      | None      | <ul style="list-style-type: none"> <li>- vWF:Ag significantly higher in cases than in controls</li> <li>- vWF:pp not significantly different</li> <li>- RR for IS in highest vWF:pp and vWF:Ag quartile: 1.9 (1.0–3.6)* and 1.9 (1.0–3.3)*</li> </ul> Adjustments: *Age, sex, smoking, hypertension, diabetes mellitus, hyperlipidaemia                                                                                                                                                                                                                                                                                                                                                                                                                   |
| Andersson et al, Blood, 2012 22110247            | 175 patients<br>638 controls | 'Ratio study', Frequency-matched case-control study of women and age, area of residence and year of event-matched female controls | Association between vWF:Ag and ADAMTS13 levels and risk of IS in young women; measurements median 95 mo after event | None      | <ul style="list-style-type: none"> <li>- OR for highest vWF:Ag quartile for IS: 6.7 (3.2–13.8)*</li> <li>- OR for lowest quartile ADAMTS13 activity for IS: 3.1 (1.6–5.8)* for IS</li> <li>- OR for combined lowest 10% ADAMTS13 activity and 10% highest vWF:Ag levels: 5.8 (1.7–20.2)*</li> </ul>                                                                                                                                                                                                                                                                                                                                                                                                                                                       |

Supplementary Table S1 (Continued)

| Reference (including PMID number)          | Sample size                  | Population                                                                                                             | Measurements + endpoint                                                                                                                                                                     | Follow-up | Results                                                                                                                                                                                                                                                                                                                                                                                                                                                                            |
|--------------------------------------------|------------------------------|------------------------------------------------------------------------------------------------------------------------|---------------------------------------------------------------------------------------------------------------------------------------------------------------------------------------------|-----------|------------------------------------------------------------------------------------------------------------------------------------------------------------------------------------------------------------------------------------------------------------------------------------------------------------------------------------------------------------------------------------------------------------------------------------------------------------------------------------|
| Kraft et al, PLOS One, 2014 24937073       | 233 patients<br>104 controls | Patients with TIA or IS and healthy controls                                                                           | - Predictors of vWF:Ag levels at admission<br>- Association between VWF levels and key demographic and clinical characteristics<br>- Difference in vWF levels between acute and chronic CVD | None      | *Adjustments: Age, year of event/index year, area of residence, hypercholesterolemia, hypertension, diabetes mellitus and smoking<br>- vWF:Ag levels significantly higher in cases than controls<br>- Independent predictors of vWF:Ag levels in multivariate analysis: NIHSS > 15 points, intake of platelet inhibitors before blood withdrawal and CRP at admission<br>- Significant association between CRP, leukocyte sub-sets, age, sex and stroke severity and vWF:Ag levels |
| McCabe et al, J Neurol Sci., 2015 25498844 | 53 patients<br>22 controls   | Patients with TIA or IS on aspirin in the early phase ( $\leq 4$ wk) and in the late phase ( $\geq 3$ mo) and controls | vWF:Ag levels and ADAMTST3 activity in acute phase ( $< 4$ wk) and $\geq 3$ mo after the event                                                                                              | 3 mo      | -vWF:Ag significantly higher in acute phase and after 3 mo in cases than controls<br>- ADAMTST3 activity significantly lower in acute phase but not after 3 mo in cases than in controls                                                                                                                                                                                                                                                                                           |
| Tobin et al, J Neurol Sci., 2017 28320178  | 164 patients<br>27 controls  | Patients $\leq 4$ wk of TIA or IS and age- and sex-matched controls                                                    | VWF:Ag and vWF:pp levels at baseline ( $\leq 4$ wk), 14 and 90 d later                                                                                                                      | 3 mo      | -Significantly higher vWF:Ag and vWF:pp levels at all time points in cases than in controls<br>- Highest vWF:Ag and vWF:pp levels in LAA stroke compared with other stroke sub-types and significantly higher levels at all time points compared with controls                                                                                                                                                                                                                     |

Abbreviations: AF, atrial fibrillation; CVD, cerebrovascular disease; FVIII:C, factor VIII concentration; HR, hazard ratio; hsCRP, high sensitive C-reactive protein; IS, ischaemic stroke; LAA, large artery atherosclerosis; LVD, large vessel disease; NIHSS, National Institute of Health Stroke Scale; OR, odds ratio; RR, relative risk; SVD, small vessel disease; TIA, transient ischaemic attack; vWF, von Willebrand factor; vWF:Ag, antigen; vWF:pp, propeptide; vWF:RCo, ristocetin co-activity.

Note: We searched Pubmed up to January 1, 2018, using the keywords 'vWF', 'ischaemic stroke', 'risk' and 'outcome' and reviewed previous studies investigating the association between vWF:Ag and pp levels as well as vWF activity measurements and the risk of and outcome in ischaemic stroke. We identified 11 case-control studies, which are summarized in this table.

**Supplementary Table S2** Studies on the association between vWF and ischaemic stroke

| Reference                                                   | Sample size    | Key points                                          | vWF-related endpoint                                                                                                                                                   | Follow-up       | Results                                                                                                                                                                                                                                                                                                                                                                                                                                        |
|-------------------------------------------------------------|----------------|-----------------------------------------------------|------------------------------------------------------------------------------------------------------------------------------------------------------------------------|-----------------|------------------------------------------------------------------------------------------------------------------------------------------------------------------------------------------------------------------------------------------------------------------------------------------------------------------------------------------------------------------------------------------------------------------------------------------------|
| <b>Observational studies</b>                                |                |                                                     |                                                                                                                                                                        |                 |                                                                                                                                                                                                                                                                                                                                                                                                                                                |
| Sonneveld et al, <i>Atherosclerosis</i> , 2013<br>24075746  | 925 patients   | Patients with TIA or IS                             | - Association between atherosclerosis and vWF:Ag levels<br>- Association between vWF levels and outcome                                                                | None            | - Positive association between vWF:Ag levels and calcification volume<br>- Significantly higher vWF:Ag levels in LAA compared with other subtypes<br>- OR* for high vWF levels (> 1.43 IU/mL) compared with low for poor outcome: 1.45<br><br>Adjustments: *Age, sex, blood group, cardiovascular risk factors, aortic arch and carotid calcification volume                                                                                   |
| Samai et al, <i>Stroke</i> , 2014<br>25028444               | 148 patients   | Patients with IS from a prospective stroke registry | - Association between FVIII:C and vWF Activity and outcome/<br>adverse events at discharge                                                                             | Until discharge | -OR* for combined elevated vWF activity (> 200%) and FVIII:C (> 200%) for poor functional outcome: 2.87 (1.17–7.06)<br>-OR† for combined elevated vWF activity (> 200%) and FVIII:C (> 200%) for:<br>Inpatient complications: 8.6 (1.57–46.85)<br>Neuroworsening: 3.21 (1.18–8.72)<br>Recurrent thrombotic events: 4.21 (1.57–11.28)<br><br>Adjustments: *Age, NIHSS and glucose; †additional adjustment for tissue-type plasminogen activator |
| Menih et al, <i>Wien Klin Wochenschr</i> , 2017<br>28409234 | 108 patients   | Patients with IS                                    | Association between vWF Activity and stroke severity, clinical outcome and sub-type                                                                                    | None            | - Multivariate analysis: vWF activity as predictor for NIHSS > 8 on admission<br>- Multivariate analysis: vWF activity as predictor for poor outcome at discharge (MRS $\geq 3$ )<br>- No difference of vWF activity between stroke sub-types                                                                                                                                                                                                  |
| Williams et al, <i>Stroke</i> , 2017<br>28495826            | 2,100 patients | 'The VISP trial', patients with IS                  | - Association of vWF activity and risk of stroke recurrence                                                                                                            | 2 y             | - HR* for 1 SD increase in vWF for stroke recurrence: 1.19 ( $p = 0.018$ )<br>- HR for 1 SD increase in vWF for all-cause mortality: 1.21 ( $p = 0.0122$ )<br><br>Adjustments: *intervention group (high- or low-dose B vitamins), age, race, sex, smoking, body mass index, diabetes mellitus status, hypertension and low-density lipoproteins                                                                                               |
| Tobin et al, <i>J Neurol</i> , 2014<br>24781842             | 91 patients    | Patients with TIA or IS                             | The impact of commencing or changing anti-platelet therapy on vWF:Ag and vWF:pp levels measured within 4 wk then 14 d (and > 90 d after changing anti-platelet therapy | 3 mo            | - No changes in vWF:Ag after commencing aspirin and after changing from aspirin to clopidogrel<br>- Significant reduction in vWF:Ag levels by addition of dipyridamole to Aspirin on day 14<br>- No reduction in vWF:pp levels in any group                                                                                                                                                                                                    |

Abbreviations: CE, cardioembolic; FVIII:C, factor VIII concentration; HR, hazard ratio; IS, ischaemic stroke; NIHSS, National Institute of Health Stroke Scale; OR, odds ratio; SD, standard deviation; TIA, transient ischaemic attack; vWF, von Willebrand factor; vWF:Ag, antigen; vWF:pp, propeptide.

Note: We searched Pubmed up to January 1, 2018, using the keywords 'vWF', 'ischaemic stroke', 'risk' and 'outcome' and reviewed previous studies investigating the association between vWF:Ag and pp levels as well as vWF activity measurements and the risk of and outcome in ischaemic stroke. We identified five observational studies, which are summarized in this table.

**Supplementary Table S3** Animal studies of investigational vWF inhibitors

| Animal studies      |                                                 |                                     |               |                                       |                      |  |
|---------------------|-------------------------------------------------|-------------------------------------|---------------|---------------------------------------|----------------------|--|
| Name                | Type                                            | Target                              | Model         | Outcome                               | PMID Reference       |  |
| Ajvw-2 Fa           | Monoclonal antibody                             | GP1b $\alpha$ -vWF                  | Dog           | Coronary artery thrombosis            | 11297756             |  |
| 82D6A3              | Monoclonal antibody                             | Fibrillar collagen type I/III - vWF | Baboon        | Arterial thrombosis                   | 11986216             |  |
| GPG-290             | Recombinant chimeric protein linked to human Fc | GP1b $\alpha$ -vWF                  | Dog           | Coronary thrombosis                   | 17721623             |  |
| h6B4-Fab            | Monoclonal antibody                             | GP1b $\alpha$ -vWF                  | Baboon        | Arterial thrombosis                   | 18841291             |  |
| ARC15105            | Aptamer                                         | GP1b $\alpha$ -vWF                  | Monkey        | Pharmacokinetics and pharmacodynamics | 22282355             |  |
| MHC SZ-123          | Monoclonal antibody                             | Collagen type III -vWF              | Monkey        | Arterial thrombosis                   | 28526067             |  |
| SZ-123 (MHC SZ-123) | Monoclonal antibody                             | Fibrillar collagen type III - vWF   | Rhesus Monkey | arterial thrombosis                   | 23295157<br>28526067 |  |

Abbreviations: GP, glycoprotein; vWF, von Willebrand factor.

Note: Including only those which have not yet been investigated in humans.
